# Supplementary material for: Structural transition and magnetic properties of Mn doped Bi0.88Sm0.12FeO3 ceramics
Source: Royal Society of Chemistry journal article supplement (doi:10.1039/d0ra01642j), 2020-01-01
Supplement: d0ra01642j1.pdf [file d0ra01642j1.pdf]

## Supplementary materials

### Structural transition and magnetic properties of Mn doped $\text{Bi}_{0.88}\text{Sm}_{0.12}\text{FeO}_3$ ceramics

N. T. Hien<sup>1,2</sup>, N. D. Vinh<sup>3</sup>, N. V. Dang<sup>3</sup>, T. T. Trang<sup>3</sup>, H. T. Van<sup>4</sup>, T. T. Thao<sup>3</sup>, L. T. Hue<sup>3</sup>, and  
P.T. Tho<sup>3,\*</sup>

<sup>1</sup>Ceramics and Biomaterials Research Group, Advanced Institute of Materials Science, Ton Duc Thang University, Ho Chi Minh City, Vietnam

<sup>2</sup>Faculty of Applied Sciences, Ton Duc Thang University, Ho Chi Minh City, Vietnam

<sup>3</sup>Department of Physics and Chemistry, Thai Nguyen University of Sciences, Thai Nguyen, Vietnam

<sup>4</sup>Institute of Research and Development, Duy Tan University, Da Nang 550000, Vietnam

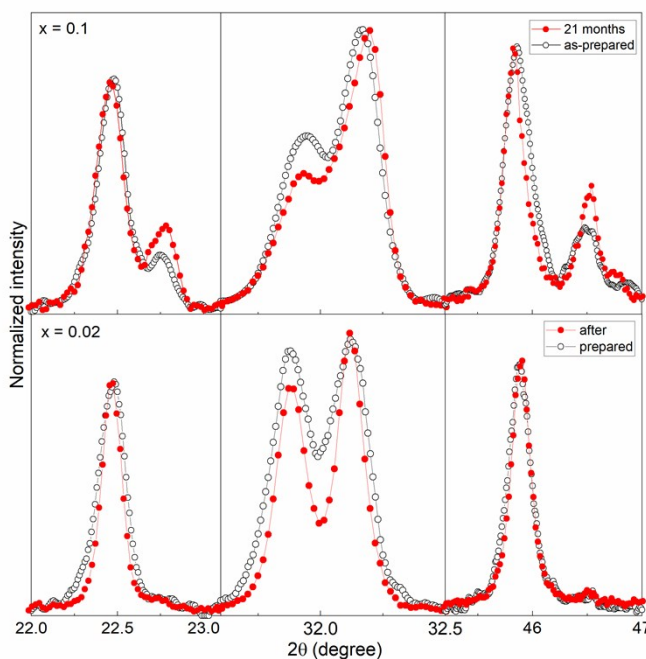

**Figure S1.** The comparison of XRD patterns of the as-prepared and after 21 months synthesis for  $x = 0.02$  and  $0.1$  samples.

The change in relative intensity of the peaks at  $2\theta$  arounds 22.5, 32, and 46 confirm the isothermal structural transition from the  $R3c$  to  $Pnam$  phases.

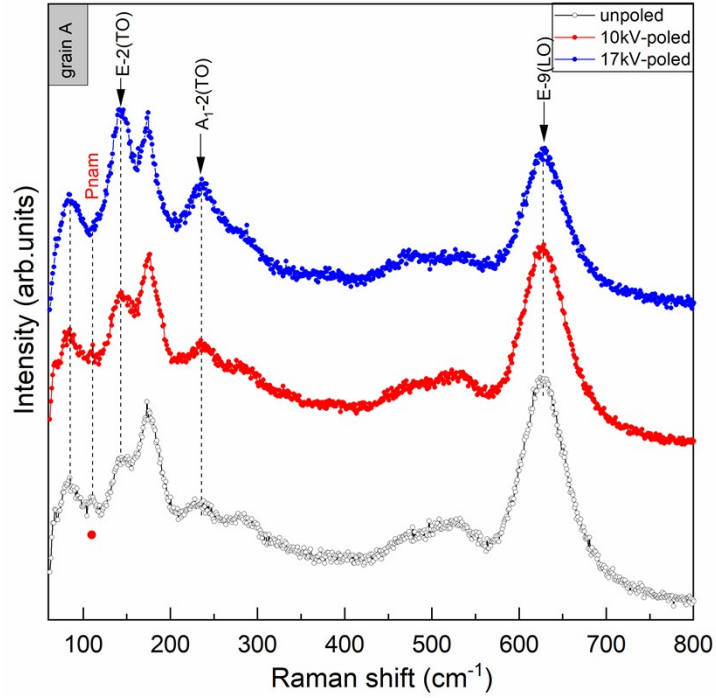

**Figure S2.** Raman spectra of sample  $x = 0.1$  measured for single grain (grain-A) before and after poled in an electric field of 10 kV and 17 kV.

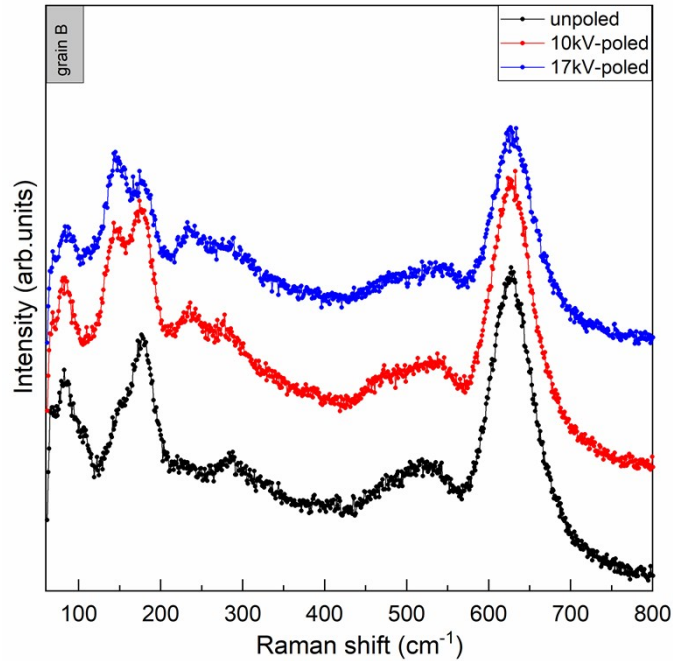

**Figure S3.** Raman spectra of sample  $x = 0.1$  measured for single grain (grain-B) before and after poled in an electric field of 10 kV and 17 kV.

Figure S2, S3 shows the Raman spectra of sample  $x = 0.1$  measured by Xpolar Raman 532 nm for different grain (grain A and B) before and after poled in an electric field of 10 kV and 17 kV. The E-2(TO), A<sub>1</sub>-2(TO), and E-9(LO) modes are obviously changed their intensity in the grain A and B. The change in intensity of these modes are well confirmed the orthorhombic/rhombohedral phases switching.
